# Supplementary material
Source: Springer Nature journal article supplement (https://www.springermedizin.de/resource/supplementary/12889_2006_1021_MOESM10_ESM.pdf/9503152)
Supplement: MOESM10 [file 9503152]

**Week 31**

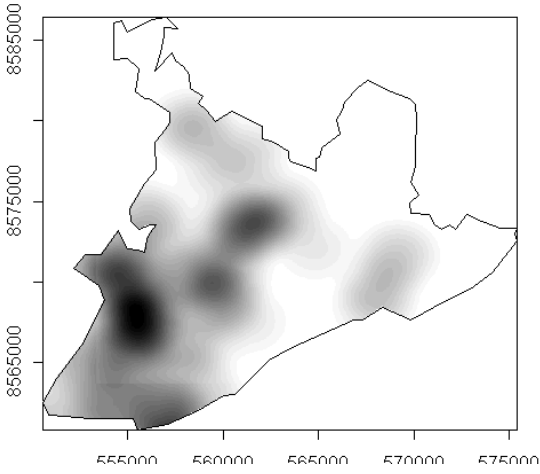

numbers of cases: 81

**Week 32**

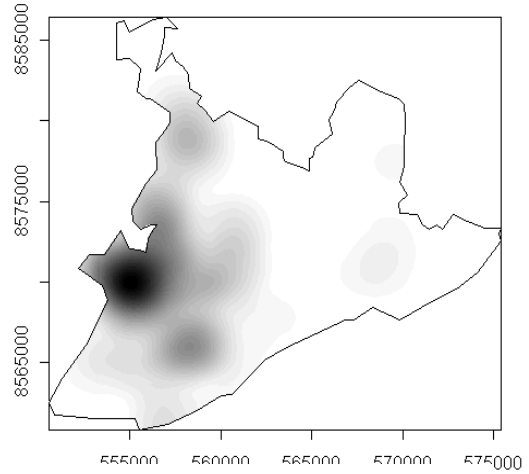

numbers of cases: 111

**Week 33**

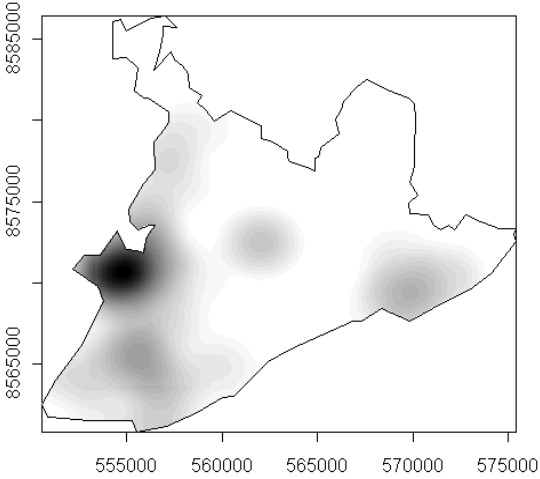

numbers of cases: 73

**Week 34**

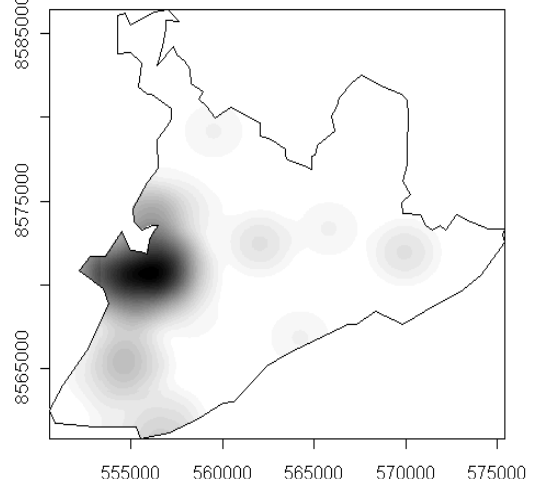

numbers of cases: 60

**Week 35**

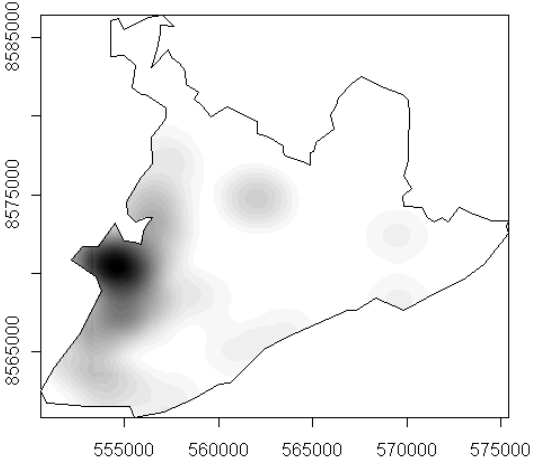

numbers of cases: 52

**Week 36**

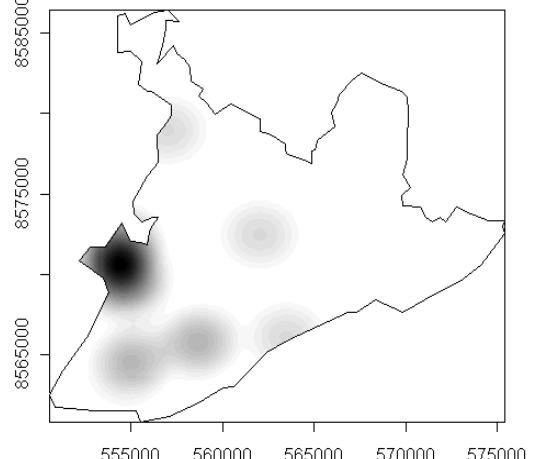

numbers of cases: 17
